# Supplementary material for: RSV Severe Infection Risk Stratification in a French 5-Year Birth Cohort Using Machine-learning
Source: PubMed Central journal article supplement — Pediatr Infect Dis J. 2024 May 7;43(9):819–24. doi: 10.1097/INF.0000000000004375 (PMC11319071; doi:10.1097/inf.0000000000004375), 2024-05-07

### Supplemental Digital Content 1.

**Figure S1:** Variable importance for variables included as predictors in the classification of SARI-WI cases versus non-(SARI-WI) non-hospitalized infants.

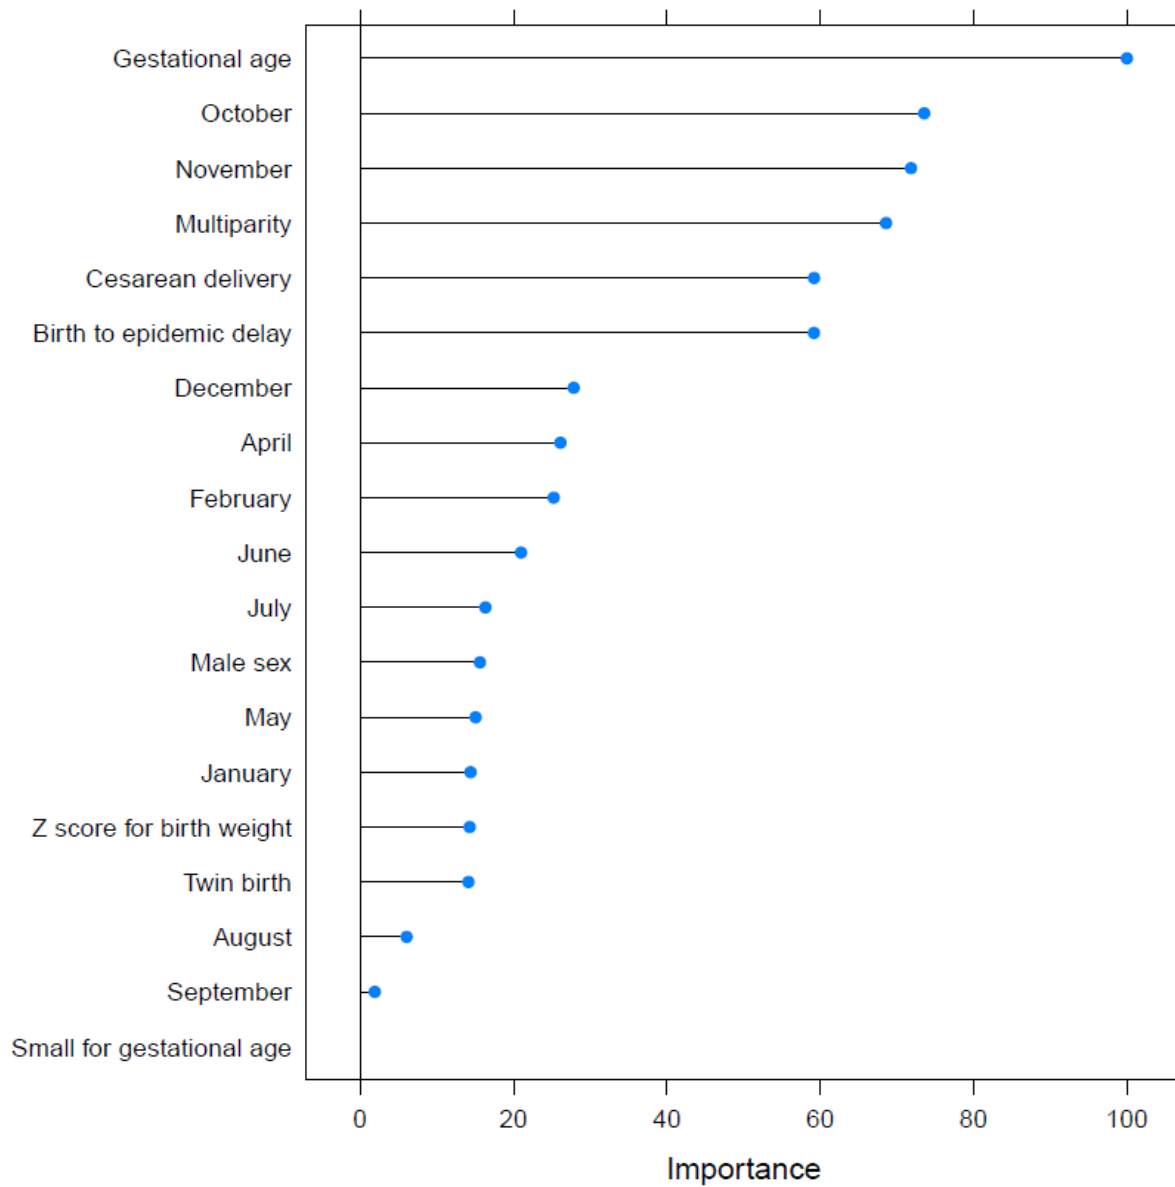

Supplement: inf-43-819-s001.pdf [file inf-43-819-s001.pdf]
