# Supplementary material for: RSV Severe Infection Risk Stratification in a French 5-Year Birth Cohort Using Machine-learning
Source: PubMed Central journal article supplement — Pediatr Infect Dis J. 2024 May 7;43(9):819–24. doi: 10.1097/INF.0000000000004375 (PMC11319071; doi:10.1097/inf.0000000000004375), 2024-05-07
Supplement: inf-43-819-s002.pdf [file inf-43-819-s002.pdf]

## Supplemental Digital Content 2.

**Table S1:** SARI with functional impairment (SARI-WI) risk for infants born from December to September according to perinatal variables of importance. This table does not cover the births in October and November, as their risk of SARI-WI are at the highest levels.

| Variable     | Modalities*<br>(a), (b), $\Delta$ | Term birth               |                          | Moderate pre-term birth  |                    | Very pre-term birth |  |
|--------------|-----------------------------------|--------------------------|--------------------------|--------------------------|--------------------|---------------------|--|
|              |                                   | (a)%, (b)%, (a-b)%       | (a)%, (b)%, (a-b)%       | (a)%, (b)%, (a-b)%       | (a)%, (b)%, (a-b)% |                     |  |
| Multiparity: | Yes }<br>No } $\Delta$            | 19 }<br>7 } $\Delta=12$  | 57 }<br>54 } $\Delta=3$  | 92 }<br>94 } $\Delta=2$  |                    |                     |  |
| Delivery:    | Cesarean }<br>Vaginal } $\Delta$  | 28 }<br>12 } $\Delta=16$ | 71 }<br>48 } $\Delta=23$ | 96 }<br>89 } $\Delta=7$  |                    |                     |  |
| Twin birth:  | Yes }<br>No } $\Delta$            | 27 }<br>14 } $\Delta=13$ | 68 }<br>51 } $\Delta=17$ | 92 }<br>94 } $\Delta=2$  |                    |                     |  |
| Sex:         | Female }<br>Male } $\Delta$       | 14 }<br>14 } $\Delta=0$  | 58 }<br>54 } $\Delta=4$  | 92 }<br>94 } $\Delta=-2$ |                    |                     |  |

The risk of SARI-WI is defined as the predicted frequency of SARI-WI for each different subgroup.

\* Each binary variable has 2 modalities a & b; the risks for subgroup a, subgroup b, and the difference between them,  $\Delta$ , are given as percentages. **Any risk difference greater than 10% is highlighted in bold.**
